# Supplementary material
Source: PubMed Central journal article supplement (PMC3399564)
Supplement: Supp_Data.pdf [file Supp_Data.pdf]

## Supplementary Data

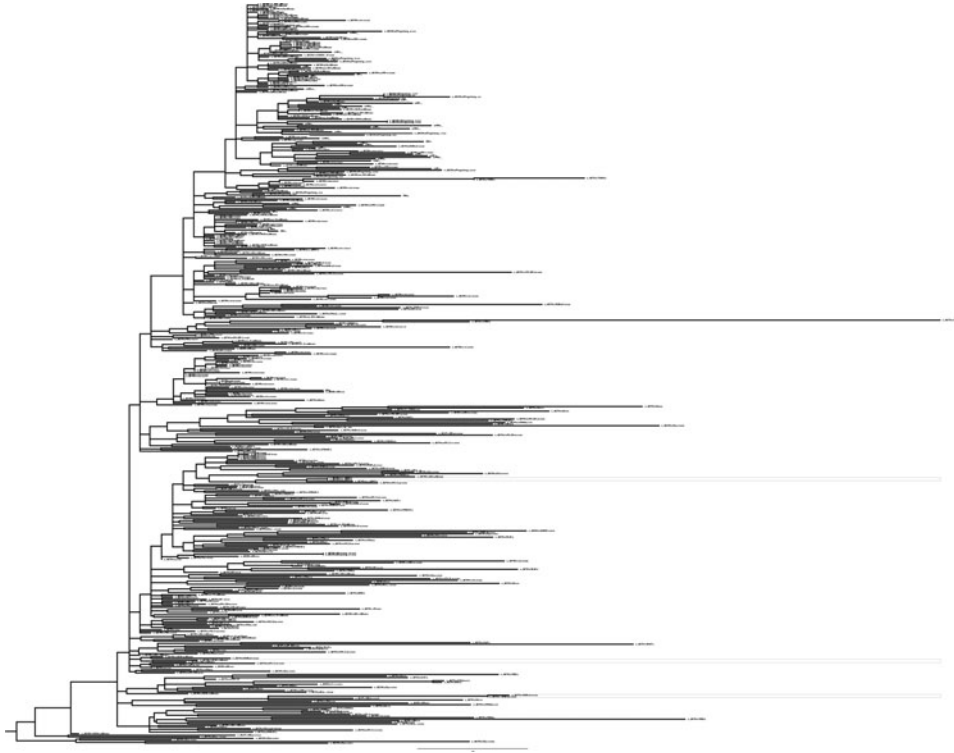

**SUPPLEMENTARY FIG. S1.** Phylogenetic tree of the CRF01\_AE envV3 molecular epidemic in Vietnam and related countries in Southeast Asia. Each sequence is identified by its name, as present in the Los Alamos HIV Database. It needs to be zoomed in to be read. There are no colors to distinguish sequences from different origins.
